# Supplementary material
Source: PubMed Central journal article supplement (PMC3590101)
Supplement: supp_2012.069716_2012_069716-Contributions.pdf [file supp_2012.069716_2012_069716-Contributions.pdf]

**Manuscript no. HAEMATOL/2012/069716 entitled “ETV6 deletion is a common additional abnormality in patients with myelodysplastic syndromes/acute myeloid leukaemia and monosomy 7“**

**Authors: Meaghan Wall, Kathleen C Rayeroux, Ruth N MacKinnon, Adrian Zordan and Lynda J Campbell**

**Information about the contributions of each person named as having participated in the study**

**1) Guarantor(s)**, i.e., person(s) who is (are) responsible for the integrity of the work as a whole:  
• Wall M, Victorian Cancer Cytogenetics Service, St Vincent’s Hospital, Melbourne, Fitzroy, Victoria, Australia, meaghan.wall@svhm.org.au

According to the International Committee of Medical Journal Editors (ICMJE) ([http://www.icmje.org/ethical\\_1author.html](http://www.icmje.org/ethical_1author.html)): “*Authorship credit should be based on: 1) substantial contributions to conception and design, acquisition of data, or analysis and interpretation of data; 2) drafting the article or revising it critically for important intellectual content; and 3) final approval of the version to be published. Authors should meet conditions 1, 2, and 3 ..... Acquisition of funding, collection of data, or general supervision of the research group alone does not constitute authorship*”.

The guarantors of this manuscript confirm that all persons designated as authors qualify for authorship, and that each author has participated sufficiently in the work to take public responsibility for appropriate portions of the content.

2) Authors who participated in the **conception of the study**: Meaghan Wall, Kathleen C Rayeroux and Lynda J Campbell

3) **Design & Methods**. The following authors were responsible for specific investigations (please detail):

- Kathleen C Rayeroux and Meaghan Wall were responsible for data collection.
- Kathleen C Rayeroux and Meaghan Wall were responsible for FISH testing.
- Meaghan Wall, Ruth N MacKinnon and Adrian Zordan were responsible for SNP-A testing.

4) **Results**. The following authors were responsible for specific portions of the results, including figures and tables:

- Meaghan Wall, Kathleen C Rayeroux and Lynda J Campbell were responsible for Table 1.
- Meaghan Wall, Kathleen C Rayeroux, Ruth N MacKinnon, Adrian Zordan and Lynda J Campbell were responsible for Figure 1.

5) **Writing the manuscript**. The following authors were responsible for writing the manuscript:

- Meaghan Wall, Kathleen C Rayeroux, Ruth N MacKinnon, Adrian Zordan and Lynda J Campbell were responsible for writing the manuscript.

6) **Contributors Listed in Acknowledgments**:

Staff at the Victorian Cancer Cytogenetics Service and Brett Kennedy, Vanessa Tyrell and Derek Campbell for technical help. The Victorian Cancer Agency for financial support (to MW) and the James and Vera Lawson Trust (ANZ Trustees for financial support to MW and RNM).
